# Supplementary material for: Environmentally friendly and innovative design of ZIF-67 and lignin modified composites for efficient catalytic transfer hydrodeoxygenation of lignin-related phenols
Source: Royal Society of Chemistry journal article supplement (doi:10.1039/d4se01220h), 2024-01-01
Supplement: d4se01220h1.pdf [file d4se01220h1.pdf]

## Supporting information

### **Environmentally-friendly and innovative design of ZIF-67 and lignin modified composite for efficient catalytic transfer hydrodeoxygenation of lignin-related phenols**

Mengqing Zhou <sup>a</sup>, Changzhou Chen <sup>a, \*</sup>, Jie Jiang <sup>a</sup>, Yajun Liu <sup>a</sup>, Jianchun Jiang <sup>a, b</sup>

*<sup>a</sup> Fujian Provincial Key Laboratory of Biomass Low-Carbon Conversion, Academy of  
Advanced Carbon Conversion Technology, Huaqiao University, Xiamen 361021,  
China*

*<sup>b</sup> Institute of Chemical Industry of Forest Products, Chinese Academy of Forestry,  
Nanjing 210042, China*

*\*E-mail address: [chenchangzhou@hqu.edu.cn](mailto:chenchangzhou@hqu.edu.cn) (C. Chen)*

## 1. Catalyst characterization

X-ray diffraction (XRD) analyses were performed using the Rigaku Smartlab 9KW instrument (Japan), scanning from 10 to 80° at a rate of 10°/min. Raman spectra were acquired using the HORIBA HR Evolution spectrometer (Japan) equipped with 532 nm excitation lasers, covering a wavenumber range from 50 to 4000 cm<sup>-1</sup>. The N<sub>2</sub> adsorption-desorption measurements were conducted at -196 m°C using the Micromeritics ASAP 2460 (U.A.S) device to determine the specific surface area and pore size distribution. The scanning electron microscope (SEM) instrument was the ZEISS GeminiSEM 300(Germany), and high-resolution transmission electron microscope (HRTEM) patterns were obtained using the FEI Talos F200x (USA). X-ray photoelectron spectroscopy (XPS) was conducted using the Thermo Scientific K-Alpha spectrometer equipped with an Al K $\alpha$  X-ray radiation source to investigate the chemical surface composition and elemental states of the catalysts. H<sub>2</sub> temperature programmed reduction (H<sub>2</sub>-TPR) and NH<sub>3</sub> temperature programmed desorption (NH<sub>3</sub>-TPD) profiles were generated using the Micromeritics AutoChem II 2920 with a thermal conductivity detector (TCD). For H<sub>2</sub>-TPR, 50 mg of catalyst powder was pre-treated by drying from room temperature to 300 °C at 10 °C/min. The sample was subsequently exposed to 10% H<sub>2</sub>/Ar gas (50 mL/min) until stabilization, followed by reduction from 50 to 800 °C at 10 °C/min ramp rate, with H<sub>2</sub> consumption monitored by TCD. For NH<sub>3</sub>-TPD, 50 mg of catalyst powder underwent preconditioning by heating from room temperature to 300 °C at a rate of 10 °C/min in a U-shaped quartz tube. The sample was then purged with airflow (30-50 mL/min) until reaching 50 °C, followed by exposure to 10%

NH<sub>3</sub>/He gas (30-50 mL/min) until saturation. Adsorbed NH<sub>3</sub> was removed by varying the gas flow rate for 1 hour, and desorption occurred in He flow from 50 to 800 °C at 10 °C/min ramp rate, with evolved gases measured by TCD. Infrared absorption spectroscopy was performed using the Tensor 27 instrument, analyzing samples within the 800-4000 cm<sup>-1</sup> range. Fourier-transform infrared spectroscopy (FT-IR) utilized the Thermo Scientific iN10 instrument from the United States. Sample preparation involved grinding a small amount of sample and dried potassium bromide powder in a mortar, pressing the mixture into transparent thin films on a hydraulic press in a dry environment. During testing, the background spectrum and the infrared spectrum of the sample were collected, with a resolution of 4 cm<sup>-1</sup>, 32 scans, and a wavenumber range of 400/600-4000 cm<sup>-1</sup>.

The reaction filtrate was collected for GC/MS analysis (Fuli, GC9790 Plus) using n-dodecane as the internal standard. The GC-MS analysis utilized a 30 m\*0.25\*0.25 µm capillary column coated. High-purity helium served as the carrier gas at a flow rate of 1.0 mL/min. The specific inlet mode and temperature settings were applied. Initially, the column temperature was set to 60 °C and maintained for 2 minutes to facilitate sample injection. Subsequently, the temperature was ramped at 10 °C/min until reaching 240 °C, where it was held for 1 minute.

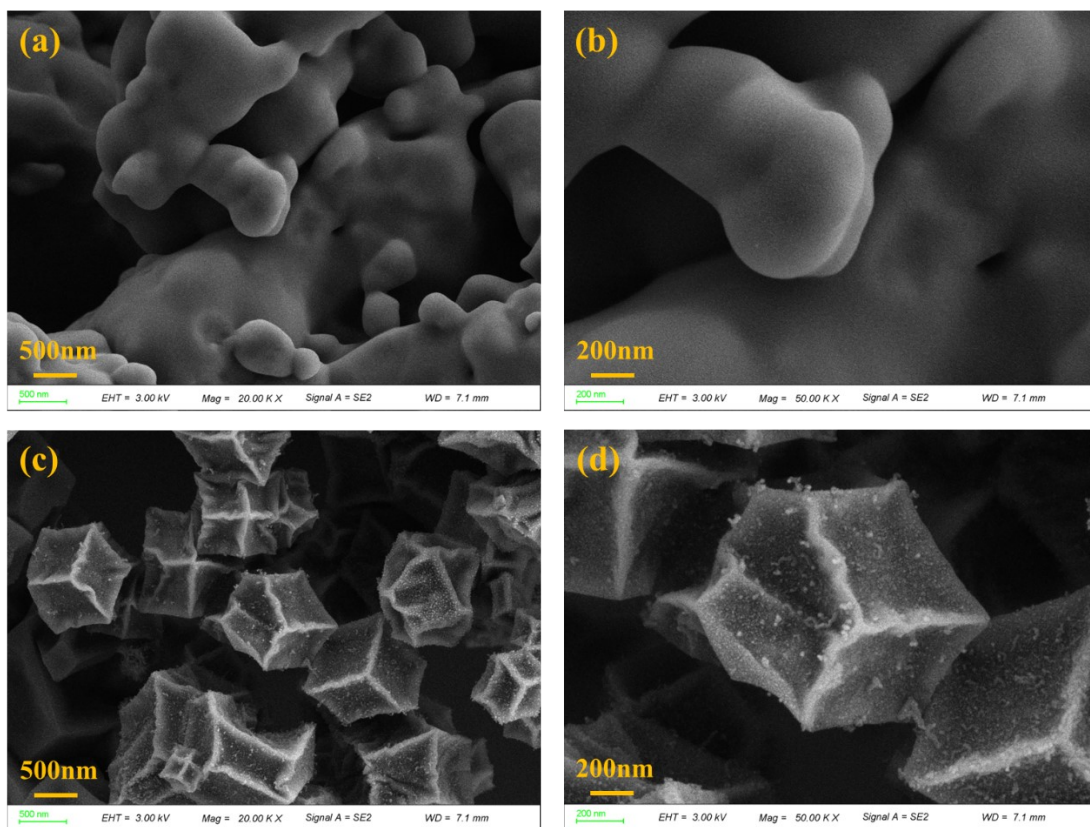

Fig. S1 SEM images of (a, b) Co@KL, (c, d) Co-ZIF catalysts.
